# Supplementary material for: Ticagrelor alleviates pyroptosis of myocardial ischemia reperfusion-induced acute lung injury in rats: a preliminary study
Source: PeerJ journal article supplement (doi:10.7717/peerj.16613), 2024-01-04
Supplement: submitted_pictures20231105.pdf [file submitted_pictures20231105.pdf]

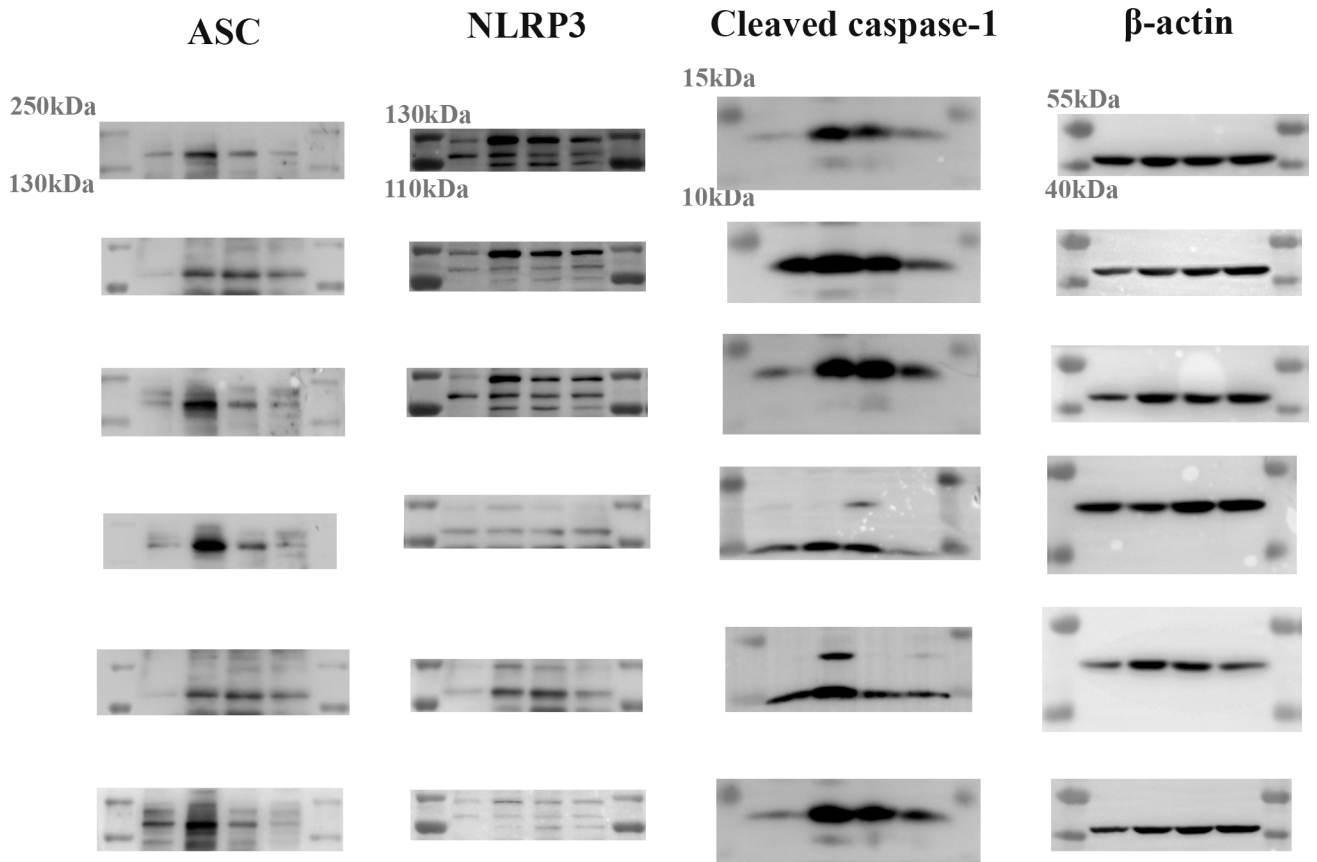

**the group of lanes in the pictures from left to right is control,  
MIRI, MIRI + low ticagrelor, MIRI + high ticagrelor;**

**HE**

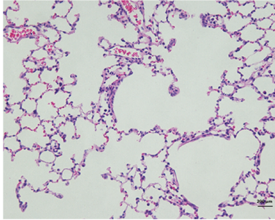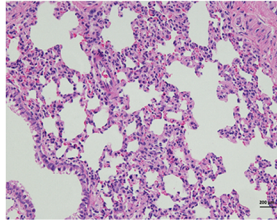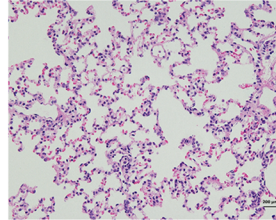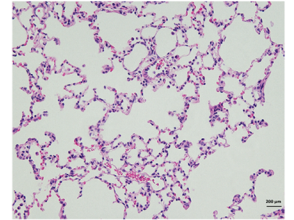

**MPO**

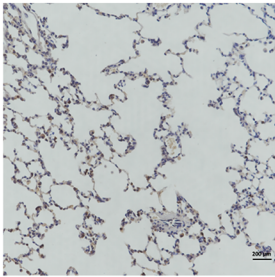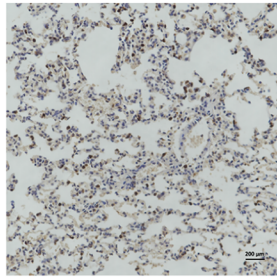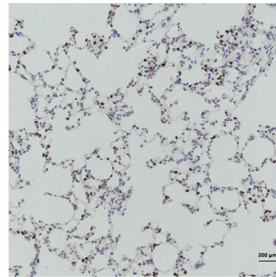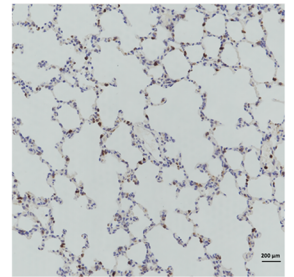

**NLRP3**

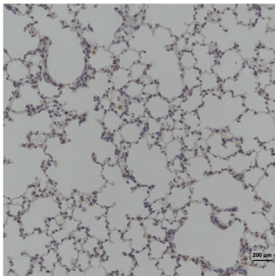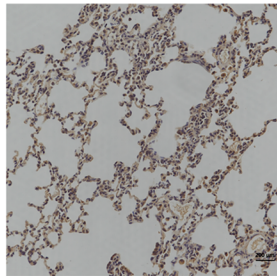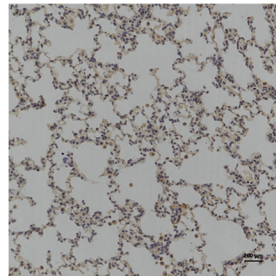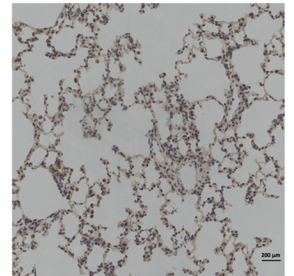

**Cleaved caspase-1**

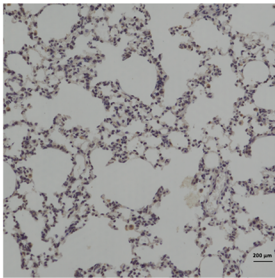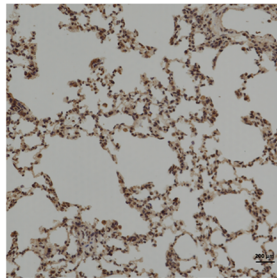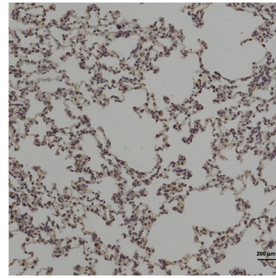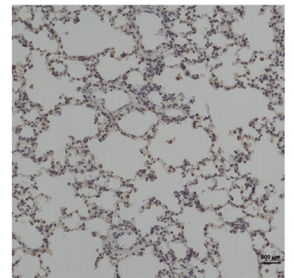

**control**

**MIRI**

**MIRI+low ticagrelor**

**MIRI+high ticagrelor**
